# Supplementary material for: Arthrodesis of the proximal interphalangeal joint of the finger – a systematic review
Source: PubMed Central journal article supplement — EFORT Open Rev. 2022 Jan 11;7(1):49–58. doi: 10.1530/EOR-21-0102 (PMC8788152; doi:10.1530/eor-21-0102), 2022-01-11

**Figure 1** Frequency of non-unions as mean and 95% confidence intervals for each technique (lower band cut of at 0)

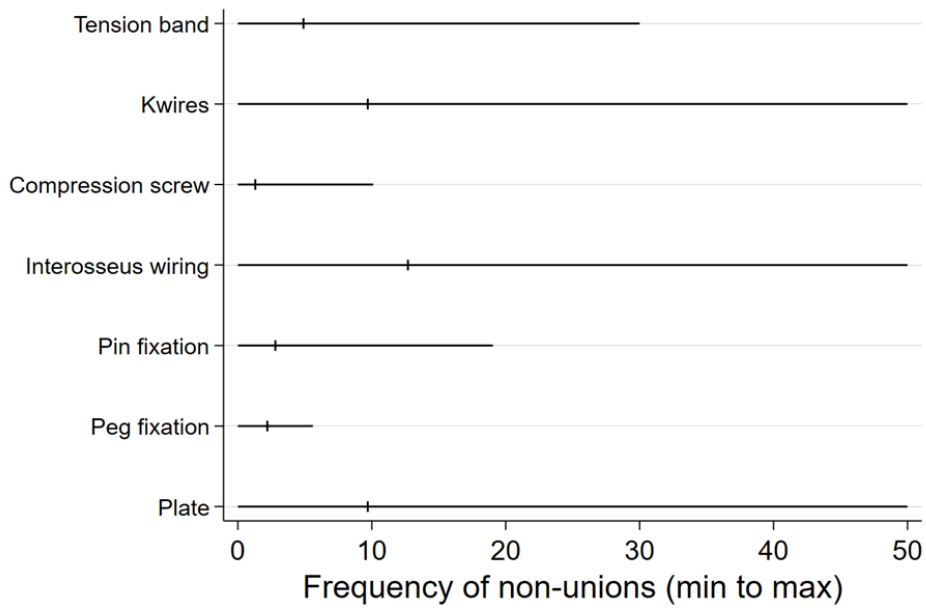

**Figure 2** Non-unions of different techniques in comparison to K-wires

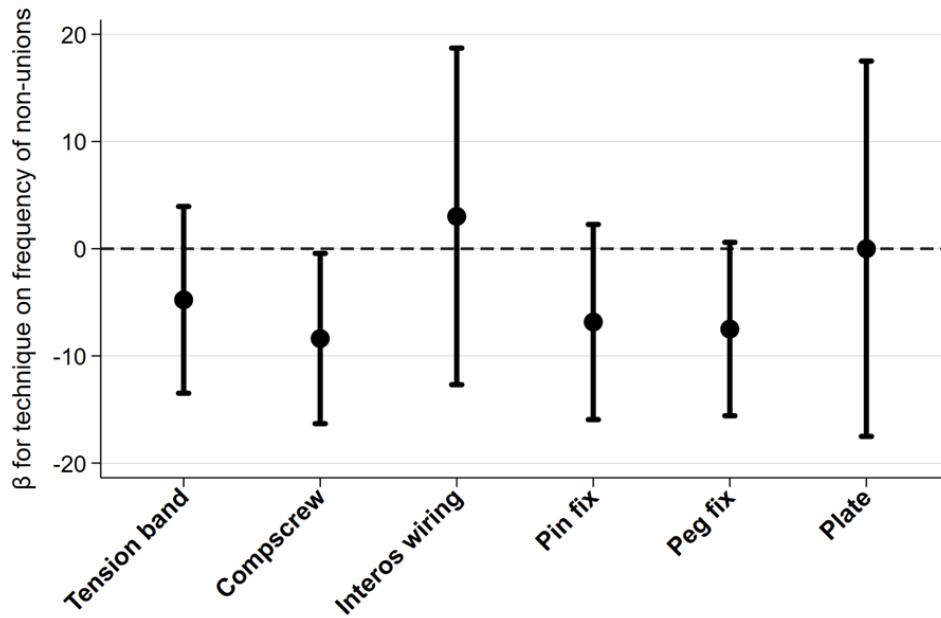

Supplement: EOR-21-0102supplementary_figure_1.pdf [file EOR-21-0102supplementary_figure_1.pdf]
